# Supplementary material
Source: Springer Nature journal article supplement (https://www.springermedizin.de/resource/supplementary/12984_2007_138_MOESM8_ESM.pdf/9605382)

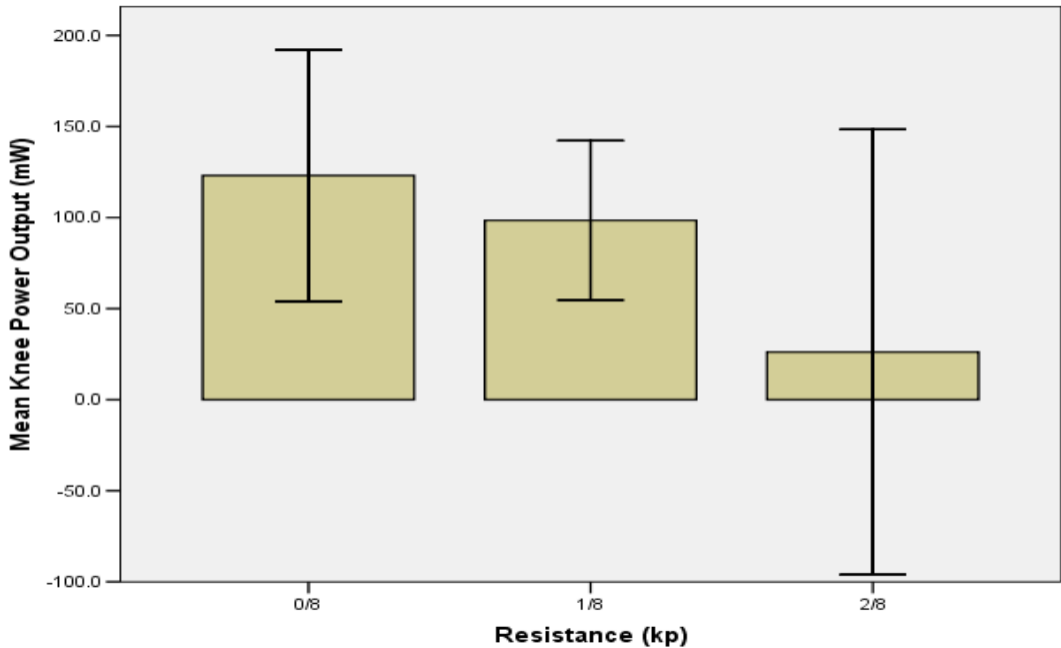

Supplement: MOESM8 [file 9605382]
